# Supplementary material for: KLF2 Protects against Osteoarthritis by Repressing Oxidative Response through Activation of Nrf2/ARE Signaling In Vitro and In Vivo
Source: Hindawi journal article supplement (doi:10.1155/2019/8564681), 2019-11-19
Supplement: f1 [file 8564681.f1.pdf]

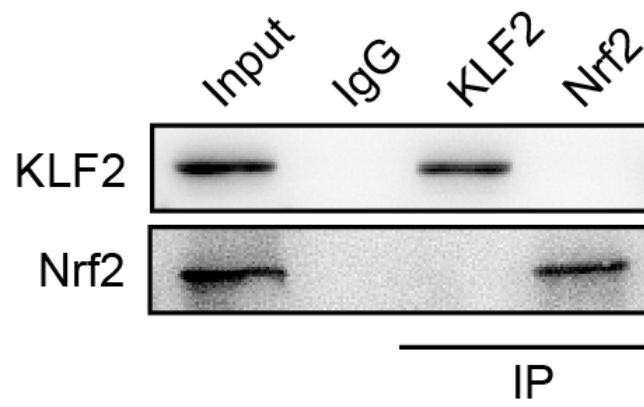

Figure S1: Co-immunoprecipitation measuring the interaction of KLF2 and Nrf2.
